# Supplementary material for: Guiding Ketogenic Diet with Breath Acetone Sensors
Source: PubMed Central journal article supplement (PMC6264102; doi:10.3390/s18113655), 2018-10-28
Supplement: sensors-18-03655-s001.pdf [file sensors-18-03655-s001.pdf]

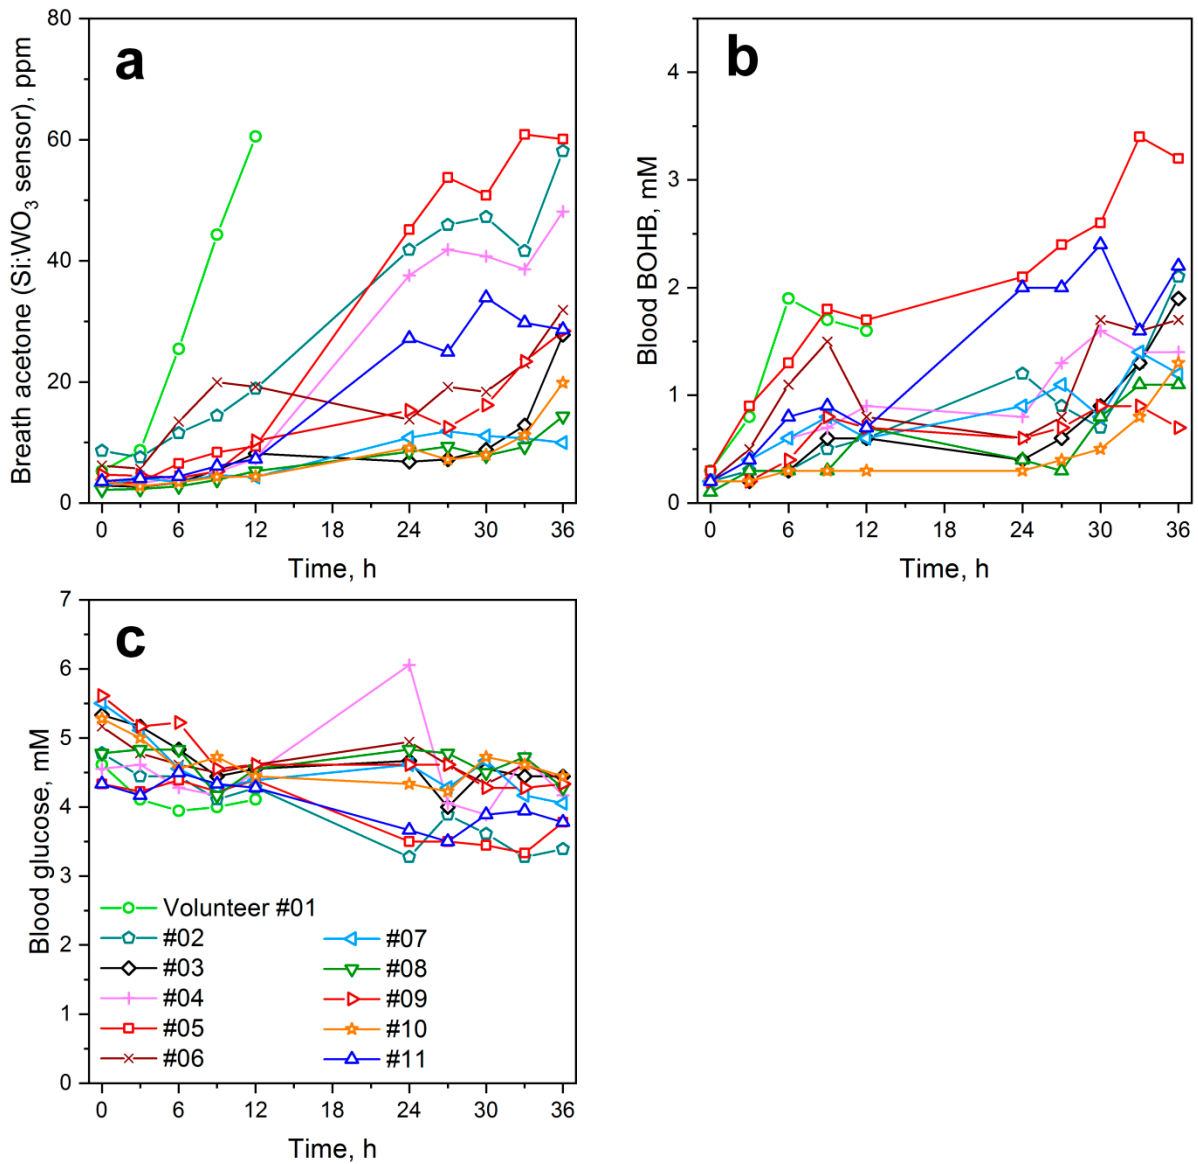

**Figure S1:** Individual (a) breath acetone, capillary blood (b) BOHB and (c) glucose levels of 11 volunteers during a 36-h ketogenic diet. Note that volunteer #1 (green circles) aborted the experiment already after 24 h due to strong nausea. Volunteer #4 (pink crosses) suffered also from nausea after the overnight sleep (approx. at  $t = 22$  h) and took a small dose of dextrose resulting in the observed blood glucose peak at  $t = 24$  h.
